# Supplementary material
Source: publisher figshare collection journal article supplement (https://tandf.figshare.com/articles/dataset/_/2066664)
Supplement: Supplementary file 2 [file 1]

### Table S3

MassARRAY primers:

|                |                                                         |
|----------------|---------------------------------------------------------|
| mort_Up_10F    | aggaagagagTGGTTTTGTTTTTATTTTTTTAGGAG                    |
| mort_Up_T7R    | cagtaatagactcactataggagaaggctCAAATAAATCCCCACTATTAACCAA  |
| mort_Start_10F | aggaagagagTTGGTTAATAGTGGGGATTTATTG                      |
| mort_Start_T7R | cagtaatagactcactataggagaaggctTCCTCACACATATTCAAAATAACACA |
